# Supplementary material for: PEPT1 is essential for the growth of pancreatic cancer cells: a viable drug target
Source: Oxford University Press journal article supplement (doi:10.1042/bcj20210377), 2021-09-27
Supplement: bcj-2021-0377_supp.pdf [file bcj-2021-0377_supp.pdf]

Supplemental material

Figure legend

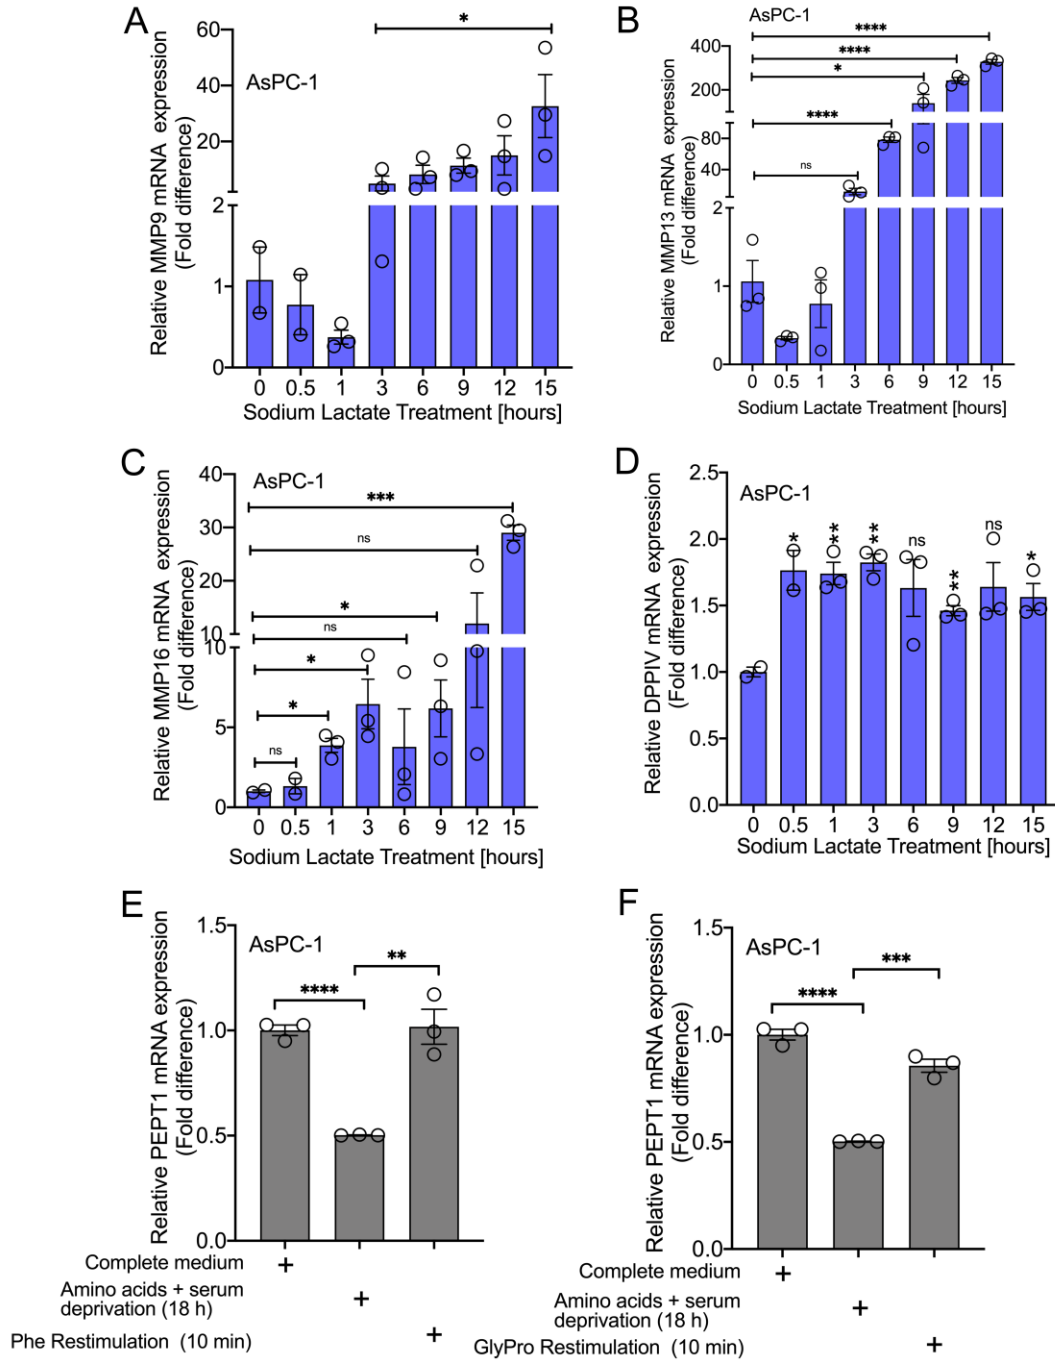

Figure S1

**Figure S1. Lactate in the TME as a possible signaling molecule in support of PEPT1 function.** Real-time PCR showing relative mRNA expression of MMP9 (A), MMP13 (B), MMP16 (C), and DPPIV (D) in control and lactate-treated AsPC-1 cells. Real-time PCR showing relative PEPT1 mRNA expression in amino acid- and serum-starved AsPC-1 cells re-stimulated with Phe (E) and Gly-Pro (F). Data are given as mean  $\pm$  SEM. \* $p < 0.05$ , \*\* $p < 0.01$ , \*\*\* $p < 0.001$ , \*\*\*\* $p < 0.0001$ .
